# Supplementary material for: Body shape matters: Evidence from machine learning on body shape-income relationship
Source: PubMed Central journal article supplement (PMC8323889; doi:10.1371/journal.pone.0254785), 2021-07-30
Supplement: pone.0254785.s010.pdf [file pone.0254785.s010.pdf]

| Variable                               | Income (Eq. (2))    |                     | Income (Eq. (3))    |                      | Income (Eq. (4))      |                       |
|----------------------------------------|---------------------|---------------------|---------------------|----------------------|-----------------------|-----------------------|
|                                        | Male                | Female              | Male                | Female               | Male                  | Female                |
| Intercept                              | 9.678***<br>(0.345) | 9.751***<br>(0.382) | 9.678***<br>(0.342) | 9.768***<br>(0.384)  | 8.499***<br>(0.511)   | 8.737***<br>(0.537)   |
| BMI                                    | 0.006<br>(0.004)    | -0.005*<br>(0.003)  | -0.018**<br>(0.009) | -0.024***<br>(0.007) | 0.005<br>(0.004)      | -0.005*<br>(0.003)    |
| Height<br>(mm)                         |                     |                     |                     |                      | 6.6e-4***<br>(2.2e-4) | 6.3e-4***<br>(2.4e-4) |
| Weight<br>(kg)                         |                     |                     | 0.007***<br>(0.002) | 0.007**<br>(0.003)   |                       |                       |
| Covariates                             | ✓                   | ✓                   | ✓                   | ✓                    | ✓                     | ✓                     |
| $\bar{R}^2$                            | 0.332               | 0.410               | 0.339               | 0.414                | 0.338                 | 0.414                 |
| <i>F</i> -statistic vs. constant model | 31.2                | 43.8                | 29.9                | 41.4                 | 29.9                  | 41.4                  |
| <i>p</i> -value                        | 2.1e-62             | 5.2e-84             | 1.7e-63             | 1.5e-84              | 2.3e-63               | 1.4e-84               |
| <i>N</i>                               | 791                 | 802                 | 791                 | 802                  | 791                   | 802                   |

**S2 Table. The association between BMI and family income.**
