# Supplementary material for: Body shape matters: Evidence from machine learning on body shape-income relationship
Source: PubMed Central journal article supplement (PMC8323889; doi:10.1371/journal.pone.0254785), 2021-07-30
Supplement: pone.0254785.s011.pdf [file pone.0254785.s011.pdf]

| Variables (mm)                                              |                                        |
|-------------------------------------------------------------|----------------------------------------|
| Acromial Height, Sitting                                    | Head Length                            |
| Ankle Circumference                                         | Hip Breadth, Sitting                   |
| Arm Length<br>(Spine to Wrist)                              | Hip Circumference, Maximum             |
| Arm Length<br>(Shoulder to Wrist)                           | Hip Circumference Max Height           |
| Arm Length<br>(Shoulder to Elbow)                           | Knee Height                            |
| Armscye Circumference<br>(Scye Circumference Over Acromion) | Neck Base Circumference                |
| Bizygomatic Breadth                                         | Shoulder Breadth                       |
| Chest Circumference                                         | Sitting Height                         |
| Bust/Chest Circumference Under Bust                         | Height                                 |
| Buttock-Knee Length                                         | Subscapular Skinfold                   |
| Chest Girth at Scye<br>(Chest Circumference at Scye)        | Thigh Circumference                    |
| Crotch Height                                               | Thigh Circumference Max Sitting        |
| Elbow Height, Sitting                                       | Thumb Tip Reach                        |
| Eye Height, Sitting                                         | Triceps Skinfold                       |
| Face Length                                                 | Total Crotch Length<br>(Crotch Length) |
| Foot Length                                                 | Vertical Trunk Circumference           |
| Hand Circumference                                          | Waist Circumference, Preferred         |
| Hand Length                                                 | Waist Front Length                     |
| Head Breadth                                                | Waist Height, Preferred                |
| Head Circumference                                          | Weight (kg)                            |

**S3 Table. List of various body measures.**
