# Supplementary material for: Body shape matters: Evidence from machine learning on body shape-income relationship
Source: PubMed Central journal article supplement (PMC8323889; doi:10.1371/journal.pone.0254785), 2021-07-30
Supplement: pone.0254785.s012.pdf [file pone.0254785.s012.pdf]

| Variable                          | Income (Eq. (5))    |                     | Income (Eq. (6))    |                      | Income (Eq. (7))    |                      |
|-----------------------------------|---------------------|---------------------|---------------------|----------------------|---------------------|----------------------|
|                                   | Male                | Female              | Male                | Female               | Male                | Female               |
| Intercept                         | 9.823***<br>(0.309) | 9.629***<br>(0.392) | 9.841***<br>(0.307) | 9.620***<br>(0.392)  | 9.823***<br>(0.317) | 9.638***<br>(0.382)  |
| $P_1$                             | 0.052***<br>(0.020) | 0.033*<br>(0.018)   |                     |                      | 0.052***<br>(0.019) | 0.024<br>(0.020)     |
| $P_2$                             |                     |                     | 2.0e-4<br>(0.002)   | -0.056***<br>(0.017) | -0.002<br>(0.019)   | -0.052***<br>(0.018) |
| $P_3$                             |                     |                     |                     |                      |                     | 0.014<br>(0.020)     |
| Covariates                        | ✓                   | ✓                   | ✓                   | ✓                    | ✓                   | ✓                    |
| $\bar{R}^2$                       | 0.337               | 0.410               | 0.330               | 0.415                | 0.336               | 0.415                |
| $F$ -statistic vs. constant model | 31.9                | 43.8                | 31.0                | 44.7                 | 29.5                | 38.9                 |
| $p$ -value                        | 1.6e-63             | 5.4e-84             | 6.9e-62             | 1.9e-85              | 9.4e-63             | 3.0e-84              |
| $N$                               | 791                 | 802                 | 791                 | 802                  | 791                 | 802                  |

**S4 Table. The association between body-type parameters and family income.**
