# Supplementary material for: Body shape matters: Evidence from machine learning on body shape-income relationship
Source: PubMed Central journal article supplement (PMC8323889; doi:10.1371/journal.pone.0254785), 2021-07-30
Supplement: pone.0254785.s013.pdf [file pone.0254785.s013.pdf]

| Variable                               | Income (Eq. (5))      |                       | Income (Eq. (6))    |                     | Income (Eq. (7))      |                      |
|----------------------------------------|-----------------------|-----------------------|---------------------|---------------------|-----------------------|----------------------|
|                                        | Male                  | Female                | Male                | Female              | Male                  | Female               |
| Intercept                              | 8.608***<br>(0.492)   | 8.573***<br>(0.534)   | 9.680***<br>(0.347) | 9.751***<br>(0.386) | 8.499***<br>(0.513)   | 8.490***<br>(0.625)  |
| Height<br>(mm)                         | 6.8e-4***<br>(2.1e-4) | 6.4e-4***<br>(2.4e-4) |                     |                     | 6.6e-4***<br>(2.2e-4) | 6.2e-4**<br>(2.4e-4) |
| BMI                                    |                       |                       | 0.006<br>(0.004)    | -0.005*<br>(0.003)  | 0.005<br>(0.004)      | -0.004<br>(0.003)    |
| Hip-to-waist<br>Ratio                  |                       |                       |                     |                     |                       | 0.002<br>(0.002)     |
| Covariates                             | ✓                     | ✓                     | ✓                   | ✓                   | ✓                     | ✓                    |
| $\bar{R}^2$                            | 0.338                 | 0.412                 | 0.332               | 0.410               | 0.338                 | 0.413                |
| <i>F</i> -statistic vs. constant model | 32.0                  | 44.2                  | 31.2                | 43.8                | 29.9                  | 38.5                 |
| <i>p</i> -value                        | 1.0e-63               | 1.0e-84               | 2.1e-62             | 5.2e-84             | 2.3e-63               | 2.1e-83              |
| <i>N</i>                               | 791                   | 802                   | 791                 | 802                 | 791                   | 799                  |

**S5 Table. The association between BMI/height/hip-to-waist-ratio and family income.**
