# Supplementary material for: Body shape matters: Evidence from machine learning on body shape-income relationship
Source: PubMed Central journal article supplement (PMC8323889; doi:10.1371/journal.pone.0254785), 2021-07-30
Supplement: pone.0254785.s014.pdf [file pone.0254785.s014.pdf]

| Variable                               | Height (1 <sup>st</sup> -step Eq. (S.11)) |                         | Income (2 <sup>nd</sup> -step Eq. (S.12)) |                      |
|----------------------------------------|-------------------------------------------|-------------------------|-------------------------------------------|----------------------|
|                                        | Male                                      | Female                  | Male                                      | Female               |
| Intercept                              | 1832.318***<br>(32.212)                   | 1634.629***<br>(27.136) | 7.785***<br>(1.104)                       | 10.674***<br>(1.294) |
| Height<br>(mm)                         |                                           |                         | 0.001*<br>(5.9e-4)                        | -6.4e-4<br>(7.5e-4)  |
| BMI                                    |                                           |                         | 0.004<br>(0.004)                          | -0.005<br>(0.003)    |
| Hip-to-waist<br>Ratio                  |                                           |                         |                                           | 0.002<br>(0.002)     |
| $\hat{\nu}$                            |                                           |                         | -6.0e-4<br>(6.5e-4)                       | 0.001*<br>(8.0e-4)   |
| Shoe Size                              | 13.502***<br>(4.958)                      | 19.847***<br>(4.187)    |                                           |                      |
| Jacket Size<br>(Blouse Size)           | 10.132***<br>(1.309)                      | 7.425***<br>(1.874)     |                                           |                      |
| Pants Size                             | 8.372***<br>(2.384)                       | 1.010<br>(1.416)        |                                           |                      |
| Covariates                             | ✓                                         | ✓                       | ✓                                         | ✓                    |
| Proxy Variables                        | ✓                                         | ✓                       | ✓                                         | ✓                    |
| $\bar{R}^2$                            | 0.228                                     | 0.203                   | 0.327                                     | 0.404                |
| <i>F</i> -statistic vs. constant model | 10.7                                      | 10.1                    | 17.0                                      | 24.1                 |
| <i>p</i> -value                        | 3.39e-29                                  | 9.4e-28                 | 5.8e-47                                   | 1.1e-68              |
| <i>N</i>                               | 660                                       | 716                     | 660                                       | 716                  |

S6 Table. The association between BMI/height/hip-to-waist-ratio and family income - Control function approach.
