# Supplementary material for: Body shape matters: Evidence from machine learning on body shape-income relationship
Source: PubMed Central journal article supplement (PMC8323889; doi:10.1371/journal.pone.0254785), 2021-07-30
Supplement: pone.0254785.s015.pdf [file pone.0254785.s015.pdf]

| Variable                          | $P_1$ (1 <sup>st</sup> -step Eq. (S.11)) |                     | Income (2 <sup>nd</sup> -step Eq. (S.12)) |                      |
|-----------------------------------|------------------------------------------|---------------------|-------------------------------------------|----------------------|
|                                   | Male                                     | Female              | Male                                      | Female               |
| Intercept                         | 0.546<br>(0.410)                         | -0.181<br>(0.347)   | 9.945***<br>(0.336)                       | 9.735***<br>(0.365)  |
| $P_1$                             |                                          |                     | 0.097**<br>(0.049)                        | -0.074<br>(0.056)    |
| $P_2$                             |                                          |                     | 6.5e-4<br>(0.019)                         | -0.069***<br>(0.018) |
| $P_3$                             |                                          |                     |                                           | 0.009<br>(0.020)     |
| $\hat{\nu}$                       |                                          |                     | -0.058<br>(0.055)                         | 0.101*<br>(0.058)    |
| Shoe Size                         | 0.159**<br>(0.062)                       | 0.193***<br>(0.053) |                                           |                      |
| Jacket Size<br>(Blouse Size)      | 0.118***<br>(0.016)                      | 0.099**<br>(0.025)  |                                           |                      |
| Pants Size                        | 0.123***<br>(0.030)                      | 0.040**<br>(0.020)  |                                           |                      |
| Covariates                        | ✓                                        | ✓                   | ✓                                         | ✓                    |
| Proxy Variables                   | ✓                                        | ✓                   | ✓                                         | ✓                    |
| $\bar{R}^2$                       | 0.217                                    | 0.203               | 0.325                                     | 0.408                |
| $F$ -statistic vs. constant model | 10.1                                     | 10.2                | 16.9                                      | 24.6                 |
| $p$ -value                        | 1.9e-27                                  | 8.1e-28             | 1.4e-46                                   | 6.9e-70              |
| $N$                               | 660                                      | 718                 | 660                                       | 718                  |

S7 Table. The association between body-type parameters and family income - Control function approach.
