# Supplementary material for: Body shape matters: Evidence from machine learning on body shape-income relationship
Source: PLoS One. 2021 Jul 30;16(7):e0254785. doi: 10.1371/journal.pone.0254785 (PMC8323889; doi:10.1371/journal.pone.0254785)
Supplement: S1 Table — (PDF) [file pone.0254785.s009.pdf]

| Variable                          | Income (Eq. (2))    |                     | Income (Eq. (3))    |                      | Income (Eq. (4))    |                      |
|-----------------------------------|---------------------|---------------------|---------------------|----------------------|---------------------|----------------------|
|                                   | Male                | Female              | Male                | Female               | Male                | Female               |
| Intercept                         | 9.685***<br>(0.332) | 9.747***<br>(0.393) | 9.668***<br>(0.336) | 9.746***<br>(0.389)  | 8.965***<br>(0.523) | 8.885***<br>(0.544)  |
| Reported BMI                      | 0.005<br>(0.004)    | -0.005<br>(0.003)   | -0.007<br>(0.009)   | -0.019***<br>(0.007) | 0.005<br>(0.005)    | -0.004<br>(0.003)    |
| Reported Height<br>(mm)           |                     |                     |                     |                      | 3.9e-4*<br>(2.1e-4) | 5.2e-4**<br>(2.3e-4) |
| Reported Weight<br>(kg)           |                     |                     | 0.004*<br>(0.002)   | 0.005**<br>(0.002)   |                     |                      |
| Covariates                        | ✓                   | ✓                   | ✓                   | ✓                    | ✓                   | ✓                    |
| $\bar{R}^2$                       | 0.332               | 0.407               | 0.334               | 0.410                | 0.334               | 0.410                |
| $F$ -statistic vs. constant model | 31.1                | 43.1                | 29.2                | 40.6                 | 29.2                | 40.7                 |
| $p$ -value                        | 4.5e-62             | 7.7e-83             | 5.7e-62             | 4.9e-83              | 5.4e-62             | 3.7e-83              |
| $N$                               | 788                 | 799                 | 788                 | 799                  | 788                 | 799                  |

**S1 Table. The association between reported BMI and family income.**
